# Supplementary material for: Risk Assessment of Venous Thromboembolism among Septic Shock Patients: Single versus Concurrent Insertion of Central Venous Catheters
Source: MDPI journal article supplement (doi:10.3390/medicina60050785), 2024-05-09
Supplement: s1 [file s1]

**Table S1:** Laboratory findings

| Variable                            | All patients (N = 114) | One CVC (N = 54)     | Two CVCs (N = 60)     |
|-------------------------------------|------------------------|----------------------|-----------------------|
| Creatinine [mg/dL]                  | 1.13 (0.78 – 1.86)     | 1.14 (0.87 – 2.12)   | 1.13 (0.76 – 1.72)    |
| Fibrinogen [mg/dL]                  | 407 (279.5 – 494.5)    | 358 (256 – 490)      | 413 (284 – 499)       |
| Hemoglobin [g/dL]                   | 13.3 (11.35 – 14.35)   | 13.3 (11.5 – 14.2)   | 13.15 (11.2 – 14.4)   |
| INR                                 | 1.31 (1.13 – 1.42)     | 1.26 (1.02 – 1.4)    | 1.31 (1.16 – 1.42)    |
| pH                                  | 7.43 (7.36 – 7.47)     | 7.36 (7.3 – 7.45)    | 7.44 (7.37 – 7.49)    |
| Procalcitonin [ng/mL]               | 0.74 (0.69 – 0.82)     | 0.74 (0.7 – 0.78)    | 0.74 (0.68 – 0.94)    |
| Thrombocytes [ $10^3/\mu\text{L}$ ] | 245 (161 – 361)        | 227 (143 – 316)      | 268 (179 – 369)       |
| WBC [ $10^3/\mu\text{L}$ ]          | 15.65 (9.99 – 19.84)   | 12.93 (9.05 – 18.23) | 16.27 (11.41 – 21.58) |

Median (IQR), WBC, White blood cells.

**Table S2:** The Caprini Risk Score

| Points | Variable                     | All patients<br>(N = 114) | One CVC<br>(N = 54) | Two CVCs<br>(N = 60) |
|--------|------------------------------|---------------------------|---------------------|----------------------|
| 1      | 41-60 years old              | 15                        | 10                  | 5                    |
|        | Bed rest <3 days             | 46                        | 28                  | 18                   |
|        | COPD                         | 21                        | 11                  | 10                   |
|        | Diabetes                     | 49                        | 23                  | 26                   |
|        | Heart failure                | 34                        | 17                  | 17                   |
|        | Obesity                      | 41                        | 28                  | 13                   |
|        | Septic shock                 | 114                       | 54                  | 60                   |
|        | Smoking                      | 37                        | 21                  | 16                   |
| 2      | >3 days bed rest             | 66                        | 24                  | 42                   |
|        | Age 61-74                    | 62                        | 26                  | 36                   |
|        | CVC insertion                | 114                       | 54                  | 60                   |
|        | Hematological disease        | 37                        | 20                  | 17                   |
|        | Malignancy                   | 11                        | 4                   | 7                    |
| 3      | Above 75 years old           | 32                        | 13                  | 19                   |
|        | Chronic venous insufficiency | 7                         | 2                   | 5                    |

Counts

**Table S3:** Comorbidities

| <b>Variable</b>              | <b>All patients</b><br>(N = 114) | <b>One CVC</b><br>(N = 54) | <b>Two CVCs</b><br>(N = 60) |
|------------------------------|----------------------------------|----------------------------|-----------------------------|
| Diabetes mellitus            | 49 (43%)                         | 23 (42.6%)                 | 26 (43.3%)                  |
| Hematologic diseases         | 39 (34.2%)                       | 17 (31.5%)                 | 22 (36.7%)                  |
| Heart failure                | 34 (29.8%)                       | 17 (31.5%)                 | 17 (28.3%)                  |
| Neurological disorders       | 32 (28.1%)                       | 4 (7.4%)                   | 28 (46.7%)                  |
| Cirrhosis                    | 32 (28.1%)                       | 13 (24.1%)                 | 19 (31.7%)                  |
| COPD                         | 22 (19.3%)                       | 12 (22.2%)                 | 10 (16.7%)                  |
| Chronic kidney disease       | 15 (13.2%)                       | 6 (11.1%)                  | 9 (15%)                     |
| Active cancer                | 11 (9.6%)                        | 4 (7.4%)                   | 7 (11.7%)                   |
| Chronic venous insufficiency | 7 (6.2%)                         | 2 (3.7%)                   | 5 (8.3%)                    |
| Counts (percentages)         |                                  |                            |                             |
